# Supplementary material
Source: Springer Nature journal article supplement (https://www.springermedizin.de/resource/supplementary/13030_2010_88_MOESM2_ESM.pdf/9644744)

(i)

### Changes in breath rate pre, during and post HFYB and BAW

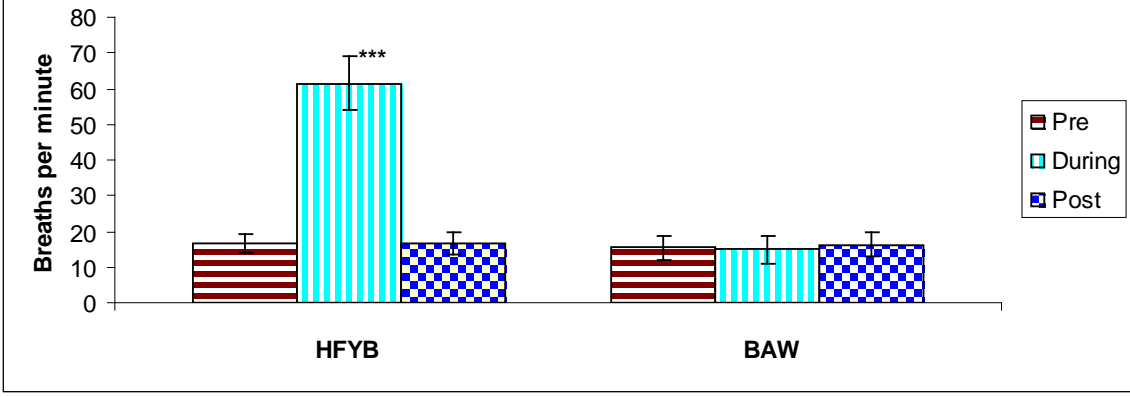

(ii)

### Changes in LF pre, during and post HFYB and BAW

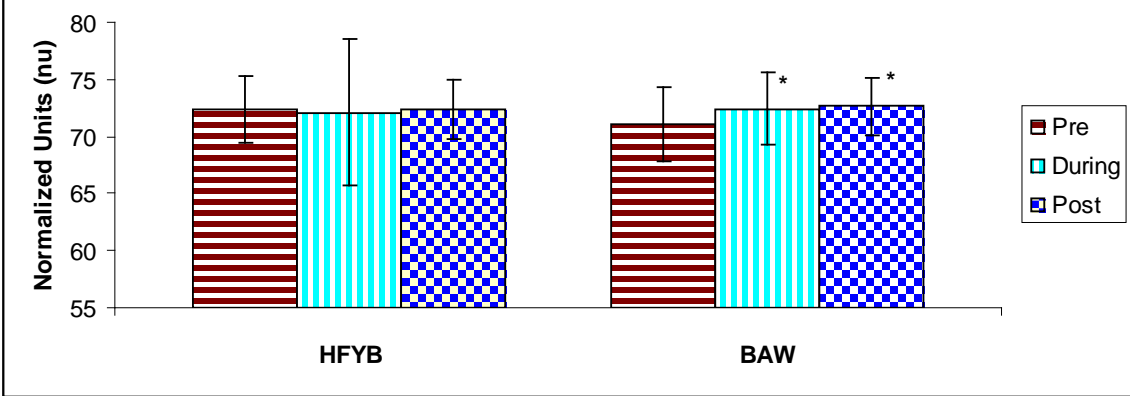

(iii)

### Changes in HF pre, during and post HFYB and BAW

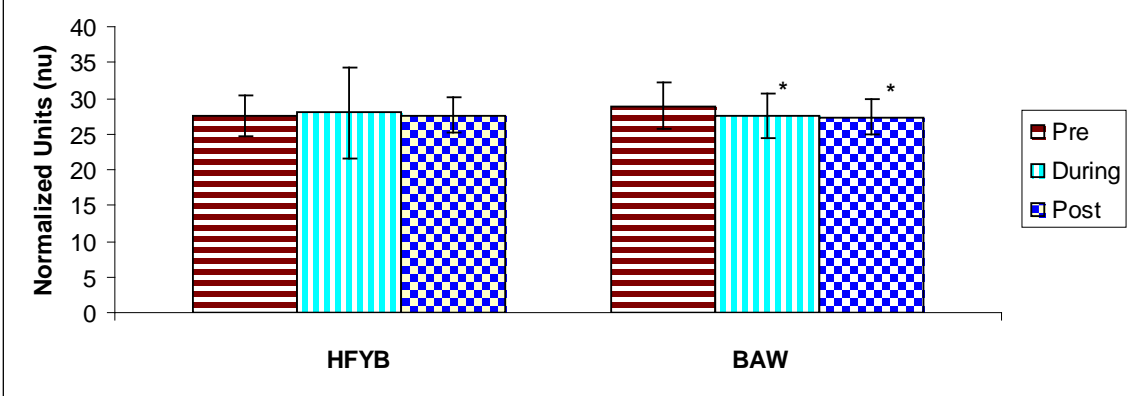

Supplement: MOESM2 [file 9644744]
